# Supplementary material
Source: Springer Nature journal article supplement (https://www.springermedizin.de/resource/supplementary/12889_2014_6703_MOESM1_ESM.pdf/9498756)
Supplement: MOESM1 [file 9498756]

Population-based sero-surveys in  
The Gambia (1986-1990)

Total number of HBeAg  
(+) index women (53)<sup>1</sup>

Number of HBeAg (+)  
index women who  
participated in the HBeAg  
Study in 1991-3 (38)

**Family of HBeAg(+)  
index women**

Index women (n=38)  
Mothers (n=38)  
    Participated (24, 63%)  
    Died (3, 8%)  
    Untraced (11, 28%)  
Older siblings (n=53)  
    Participated (17, 32%)  
    Died (17, 32%)  
    Untraced (19, 36%)  
Children (n=137)  
    Participated (96, 70%)  
    Died (17, 12%)  
    Untraced (24, 18%)

HBsAg (+) children  
n=38/96 (40%)

The same number as  
HBeAg(+) index women (38)  
was randomly selected and  
participated as HBsAg(+)  
HBeAg(-) index women and  
HBsAg(-) index women.

**Family of HBsAg(+)  
HBeAg(-) index women**

Index women (n=38)  
Mothers (n=38)  
    Participated (26, 68%)  
    Died (7, 18%)  
    Untraced (5, 13%)  
Older siblings (n=64)  
    Participated (25, 39%)  
    Died (13, 20%)  
    Untraced (26, 41%)  
Children (n=153)  
    Participated (102, 67%)  
    Died (23, 15%)  
    Untraced (28, 18%)

HBsAg (+) children  
n=14/102 (15%)

**Family of HBsAg(-) index  
women**

Index women (n=38)  
Mothers (n=38)  
    Participated (26, 68%)  
    Died (7, 18%)  
    Untraced (5, 13%)  
Older siblings (n=89)  
    Participated (36, 40%)  
    Died (31, 35%)  
    Untraced (22, 25%)  
Children (n=144)  
    Participated (101, 70%)  
    Died (16, 11%)  
    Untraced (27, 19%)

HBsAg (+) children  
n=6/101 (6%)
